# Supplementary material for: Species Mixing Proportion and Aridity Influence in the Height–Diameter Relationship for Different Species Mixtures in Mediterranean Forests
Source: MDPI journal article supplement (doi:10.3390/f13010119), 2022-01-14
Supplement: s1 [file s1]

*Supplementary material*

# **Species Mixing Proportion and Aridity Influence in the Height–Diameter Relationship for Different Species Mixtures in Mediterranean Forests**

**Diego Rodríguez de Prado<sup>1,2,\*</sup>, †, Jose Riofrío<sup>3</sup>, Jorge Aldea<sup>4</sup>, Felipe Bravo<sup>1</sup>, James McDermott<sup>5</sup>, Celia Herrero de Aza<sup>1,2</sup>**

Sustainable Forest Management Research Institute Universidad de Valladolid & INIA.  
Avda. Madrid 44, 34004 Palencia, Spain; fbravo@pvs.uva.es (F.B.);  
celia.herrero.aza@uva.es (C.H.d.A.)

<sup>2</sup> ECM Ingeniería Ambiental, S.L. C/Curtidores 17, 34003 Palencia, Spain

<sup>3</sup> Integrated Remote Sensing Studio, Department of Forest Resources Management,  
University of British Columbia, 2424 Main Mall, Vancouver, BC V6T1Z4, Canada;  
jose.g.riofrio@gmail.com (J.R.)

<sup>4</sup> Southern Swedish Forest Research Centre, Swedish University of Agricultural Sciences,  
P.O. Box 190 23422 Lomma, Sweden; Jorge.aldea@slu.se (J.A.)

<sup>5</sup> National University of Ireland, Galway, Ireland H91TK33;  
james.mcdermott@nuigalway.ie (J.M.)

\*Correspondence: diego.rodriguez.prado@uva.es

† Adapted from my Ph.D. Thesis, E.T.S de Ingenierías Agrarias, Universidad de  
Valladolid, 34004 Palencia, Spain

**Supplementary Table S1:** Stats (mean and range) of the main tree and plot variables characterizing selected SNFI plots used in our study

| Species                 | Mixture                  | Plots | Trees | h (m)         | d (cm)           | Dg (cm)          | BA (m <sup>2</sup> · ha <sup>-1</sup> ) | BAL (m <sup>2</sup> · ha <sup>-1</sup> ) | T (°C)           | P (mm)          | M (mm · °C <sup>-1</sup> ) |
|-------------------------|--------------------------|-------|-------|---------------|------------------|------------------|-----------------------------------------|------------------------------------------|------------------|-----------------|----------------------------|
| <i>Pinus halepensis</i> | <i>Pinus nigra</i>       | 227   | 1911  | 8.7 (2.7-21)  | 20.1 (7.5-95.5)  | 17.3 (10-34.8)   | 13.98 (2.14-32.5)                       | 7.61 (0-32.05)                           | 12.4 (10.2-14.4) | 564 (365-866)   | 25 (16-42)                 |
|                         | <i>Pinus pinaster</i>    | 210   | 2005  | 9.4 (3-34.5)  | 21.4 (7.5-66.8)  | 19.3 (9.2-43.9)  | 15.65 (3.77-44.42)                      | 8.86 (0-40.56)                           | 13.6 (11.2-16.8) | 630 (371-818)   | 19 (14-35)                 |
|                         | <i>Pinus pinea</i>       | 160   | 1615  | 9.5 (3.5-22)  | 21.1 (7.5-64.4)  | 18.9 (10.3-34)   | 15.58 (3.26-40.14)                      | 8.67 (0-39.71)                           | 13.3 (10.8-16.5) | 450 (352-791)   | 27 (15-37)                 |
|                         | <i>Quercus faginea</i>   | 63    | 774   | 8.5 (3-22)    | 19.8 (7.5-55)    | 16.7 (10.5-27.3) | 15.66 (3.84-31.91)                      | 8.89 (0-31.34)                           | 12.8 (11.8-14.8) | 566 (386-721)   | 25 (16-33)                 |
|                         | <i>Quercus ilex</i>      | 393   | 4049  | 9.6 (3-25)    | 20.9 (7.5-74.8)  | 16.7 (9.6-30.9)  | 15.94 (2.74-40.14)                      | 8.81 (0-39.71)                           | 13.2 (10.7-17.1) | 583 (338-805)   | 25 (12-37)                 |
| <i>Pinus nigra</i>      | <i>Pinus halepensis</i>  | 222   | 2157  | 8.6 (3-24)    | 18.9 (7.5-70.7)  | 17.1 (10-39.6)   | 16.07 (2.14-39.05)                      | 9.37 (0-38.24)                           | 12 (8.6-14.4)    | 613 (389-866)   | 28 (17-42)                 |
|                         | <i>Pinus pinaster</i>    | 293   | 3697  | 10.1 (3-28)   | 22.1 (7.5-86.6)  | 20.2 (9.5-50.9)  | 23.29 (4.02-55.61)                      | 13.7 (0-54.8)                            | 10.8 (8.6-14.1)  | 546 (381-1114)  | 26 (16-55)                 |
|                         | <i>Pinus sylvestris</i>  | 832   | 10495 | 10.1 (3-30)   | 21.3 (7.5-78)    | 18.7 (9.2-44.4)  | 21.91 (3.17-61.94)                      | 12.44 (0-61.07)                          | 10.1 (6.9-13.7)  | 653 (394-1051)  | 33 (18-59)                 |
|                         | <i>Quercus faginea</i>   | 187   | 2540  | 10 (3-26.5)   | 20.7 (7.5-76.4)  | 17.5 (9.2-50.9)  | 18.94 (2.85-44.23)                      | 10.92 (0-42.6)                           | 11.4 (9.1-13.3)  | 609 (394-732)   | 28 (18-34)                 |
|                         | <i>Quercus ilex</i>      | 410   | 5466  | 9.9 (3-27)    | 22 (7.5-76.4)    | 17.9 (8.7-42.8)  | 22.07 (2.87-54.14)                      | 12.51 (0-52.85)                          | 11 (7.2-14.1)    | 574 (426-992)   | 27 (20-58)                 |
| <i>Pinus pinaster</i>   | <i>Pinus halepensis</i>  | 197   | 1773  | 9.3 (3-25.5)  | 25.7 (7.5-65.9)  | 22.6 (10.3-48.9) | 19.15 (3.77-44.42)                      | 10.6 (0-42.87)                           | 11 (8.6-14.1)    | 521 (381-1114)  | 20 (14-35)                 |
|                         | <i>Pinus nigra</i>       | 310   | 4039  | 9.4 (3-28.5)  | 24.5 (7.5-79.9)  | 20.7 (9.5-42.8)  | 25.63 (4.02-62.14)                      | 14.18 (0-61.73)                          | 13.2 (10.1-17.8) | 471 (337-797)   | 25 (16-55)                 |
|                         | <i>Pinus pinea</i>       | 268   | 3335  | 10.3 (3-24)   | 24.7 (7.5-82.1)  | 22.9 (9.1-41)    | 22.34 (4.01-41.74)                      | 12.51 (0-41.28)                          | 12.6 (10.6-16.5) | 460 (366-791)   | 20 (14-33)                 |
|                         | <i>Pinus sylvestris</i>  | 360   | 6518  | 11.6 (3-30)   | 26.8 (7.5-76.1)  | 23 (10.4-49.1)   | 33.46 (4.04-70.45)                      | 18.28 (0-69.85)                          | 10 (7.7-14.5)    | 643 (358-1740)  | 32 (16-83)                 |
|                         | <i>Quercus ilex</i>      | 141   | 1774  | 9.5 (3-25)    | 24.9 (7.5-73.2)  | 20.8 (10.2-35.5) | 23.68 (3.36-52.99)                      | 13.33 (0-52.17)                          | 11.5 (8.8-16.4)  | 544 (344-1175)  | 26 (14-56)                 |
|                         | <i>Quercus pyrenaica</i> | 162   | 2747  | 9.6 (3-27.5)  | 23.1 (7.5-94.2)  | 19.9 (9.2-51.1)  | 25.24 (3.47-62.74)                      | 14.26 (0-61.78)                          | 10.8 (8.7-15.9)  | 583 (348-1594)  | 28 (15-68)                 |
|                         | <i>Quercus suber</i>     | 114   | 1346  | 9.7 (3-24)    | 20.9 (7.5-71.9)  | 19 (10.7-43.3)   | 20.65 (2.74-46.5)                       | 11.62 (0-44.9)                           | 14.3 (12.3-17.6) | 593 (410-1716)  | 24 (16-75)                 |
| <i>Pinus pinea</i>      | <i>Pinus halepensis</i>  | 99    | 744   | 8.6 (3-19)    | 23 (7.5-49.3)    | 20.2 (10.3-31)   | 19.12 (3.26-47.1)                       | 10.51 (0-46.7)                           | 14.4 (11.2-16.8) | 611 (372-818)   | 25 (15-37)                 |
|                         | <i>Pinus pinaster</i>    | 221   | 2069  | 8.8 (3-20)    | 26.8 (7.5-80.2)  | 24.2 (9.1-41.2)  | 17.92 (4.01-50.81)                      | 9.94 (0-50.23)                           | 13.4 (11-17.8)   | 468 (334-797)   | 20 (14-33)                 |
|                         | <i>Quercus ilex</i>      | 157   | 1301  | 8.3 (3-19)    | 25.1 (7.5-110.1) | 19.8 (9.6-41.2)  | 17.54 (3.06-56.99)                      | 9.34 (0-55.98)                           | 14.6 (10.9-17.7) | 538 (336-823)   | 22 (14-37)                 |
|                         | <i>Quercus suber</i>     | 87    | 693   | 8.7 (3-19)    | 23.7 (7.5-56.9)  | 19.4 (9.4-31.8)  | 18.98 (2.78-33.08)                      | 9.99 (0-31.04)                           | 14.9 (12.1-17.7) | 678 (449-822)   | 27 (18-37)                 |
| <i>Pinus sylvestris</i> | <i>Fagus sylvatica</i>   | 401   | 8702  | 13.7 (3-30.5) | 27.1 (7.5-112.4) | 23.8 (10.1-50.1) | 32.57 (4.39-68.88)                      | 18.32 (0-67.04)                          | 9.2 (6-13.7)     | 702 (393-1083)  | 44 (28-82)                 |
|                         | <i>Pinus nigra</i>       | 903   | 12948 | 10 (3-26)     | 20.6 (7.5-76.4)  | 18.4 (9.2-44.4)  | 23.36 (3.17-61.94)                      | 13.26 (0-50.01)                          | 9.4 (6.9-14.5)   | 625 (358-1740)  | 37 (18-68)                 |
|                         | <i>Pinus pinaster</i>    | 409   | 8304  | 13.4 (3-33)   | 25.8 (7.5-98.7)  | 23.8 (9.5-51.8)  | 32.92 (4.04-67.89)                      | 19.05 (0-66.68)                          | 6.9 (3.9-10.4)   | 1030 (760-1358) | 32 (16-83)                 |
|                         | <i>Pinus uncinata</i>    | 305   | 5668  | 12.1 (3-25)   | 26.8 (7.5-109.2) | 22.6 (10.6-44.3) | 29.88 (4.14-80.75)                      | 16.64 (0-79.42)                          | 8.2 (4.7-11.2)   | 797 (534-1233)  | 61 (39-96)                 |
|                         | <i>Quercus faginea</i>   | 224   | 3458  | 10.1 (3-22.5) | 22.2 (7.5-71.9)  | 19.1 (9.4-34.2)  | 23.22 (2.95-52.99)                      | 13.24 (0-52.39)                          | 10 (5.6-12.9)    | 788 (483-1118)  | 40 (24-72)                 |
|                         | <i>Quercus ilex</i>      | 288   | 4146  | 10.4 (3-24.5) | 21.9 (7.5-76.4)  | 18.4 (9.2-37.1)  | 21.66 (3.74-49.08)                      | 12.15 (0-48.65)                          | 10 5.9-13.6)     | 837 (474-1080)  | 42 (24-68)                 |
|                         | <i>Quercus petraea</i>   | 80    | 1445  | 12.5 (4-29.5) | 23.7 (7.8-66.8)  | 20.5 (10.4-34.4) | 27.78 (3.55-56.12)                      | 15.63 (0-55.55)                          | 9.1 (5.1-11.9)   | 853 (626-1264)  | 45 (33-82)                 |
|                         | <i>Quercus pyrenaica</i> | 403   | 9236  | 13.4 (3-33)   | 27 (7.5-112.4)   | 23.7 (9.3-51.5)  | 33.68 (2.88-76.24)                      | 19.17 (0-75.51)                          | 8.6 (6.1-11.9)   | 662 (469-1341)  | 36 (23-74)                 |
| <i>Pinus uncinata</i>   | <i>Pinus sylvestris</i>  | 238   | 4359  | 10.7 (3-27.5) | 23.1 (7.5-89)    | 20.9 (10.6-42.6) | 29.64 (4.14-61.2)                       | 17.39 (0-60.42)                          | 5.6 (3.5-8.7)    | 1157 (901-1358) | 75 (50-96)                 |

**Supplementary Table S1 (Cont.) : Stats (mean and range) of the main tree and plot variables characterizing selected SNFI plots used in our study**

| Species                  | Mixture                  | Plots | Trees | h (m)         | d (cm)           | Dg (cm)          | BA (m <sup>2</sup> · ha <sup>-1</sup> ) | BAL (m <sup>2</sup> · ha <sup>-1</sup> ) | T (°C)           | P (mm)           | M (mm · °C <sup>-1</sup> ) |
|--------------------------|--------------------------|-------|-------|---------------|------------------|------------------|-----------------------------------------|------------------------------------------|------------------|------------------|----------------------------|
| <i>Fagus sylvatica</i>   | <i>Pinus sylvestris</i>  | 169   | 2606  | 15.1 (3.5-34) | 24.6 (7.5-98.6)  | 21.4 (9.4-48.3)  | 27.13 (4.39-54.65)                      | 16.13 (0-54.26)                          | 8.4 (6.1-10.8)   | 812 (560-1141)   | 44 (28-71)                 |
|                          | <i>Quercus petraea</i>   | 121   | 2305  | 13.6 (3-32.5) | 24 (7.5-90.7)    | 20.7 (11.3-54.8) | 30.51 (4.73-80.08)                      | 19.03 (0-79.63)                          | 8.3 (6.1-11.6)   | 929 (563-1206)   | 51 (29-70)                 |
|                          | <i>Quercus pyrenaica</i> | 124   | 2106  | 16.1 (3.5-36) | 28 (7.5-92.3)    | 23.2 (9-49.1)    | 28.27 (3.35-54.85)                      | 16.3 (0-54.28)                           | 9.1 (6.7-11.1)   | 780 (538-1087)   | 41 (26-61)                 |
|                          | <i>Quercus robur</i>     | 68    | 1211  | 18.9 (3.5-34) | 33.4 (7.5-98.7)  | 28.8 (11.3-60.7) | 30.17 (5.17-67.27)                      | 17.95 (0-66.45)                          | 10.4 (6.8-13.2)  | 950 (692-1392)   | 47 (33-63)                 |
| <i>Quercus faginea</i>   | <i>Pinus halepensis</i>  | 26    | 115   | 7.1 (4-15)    | 13.9 (7.5-53.8)  | 14.3 (10.5-20.7) | 12.19 (3.84-18.39)                      | 6.9 (0-18)                               | 11.3 (9.1-13.3)  | 609 (394-738)    | 24 (16-33)                 |
|                          | <i>Pinus nigra</i>       | 97    | 563   | 7.3 (3-17)    | 15.1 (7.5-82.8)  | 15 (9.2-45.3)    | 15.44 (2.85-44.23)                      | 9.12 (0-43.83)                           | 10.6 (7.2-12.9)  | 784 (483-1009)   | 29 (18-36)                 |
|                          | <i>Pinus sylvestris</i>  | 125   | 985   | 7.7 (3-22)    | 16.3 (7.5-82.8)  | 15 (9.2-32.1)    | 17.21 (2.95-45.36)                      | 10.16 (0-44.94)                          | 11.2 (9.2-16.6)  | 624 (392-1115)   | 38 (24-56)                 |
|                          | <i>Quercus ilex</i>      | 184   | 1283  | 7.9 (3-22)    | 17.1 (7.5-92.3)  | 14.1 (8.4-53.2)  | 17.08 (2.32-50.01)                      | 9.87 (0-47.86)                           | 12.8 (11.9-14.8) | 551 (386-721)    | 30 (17-50)                 |
| <i>Quercus ilex</i>      | <i>Pinus halepensis</i>  | 286   | 2012  | 6.4 (3-16.5)  | 13.9 (7.5-60)    | 14.3 (9.3-30.9)  | 14.75 (2.74-31.48)                      | 8.73 (0-31.09)                           | 11.1 (7.2-14.1)  | 594 (426-992)    | 29 (12-43)                 |
|                          | <i>Pinus nigra</i>       | 248   | 1719  | 5.7 (3-14)    | 14.5 (7.5-72.6)  | 14.3 (8.6-28.4)  | 13.98 (2.69-36.51)                      | 8.3 (0-35.65)                            | 13.5 (9.8-17.2)  | 606 (336-900)    | 28 (20-58)                 |
|                          | <i>Pinus pinaster</i>    | 101   | 799   | 6.1 (3-11.5)  | 14.8 (7.5-92.3)  | 14.3 (9.2-35.1)  | 14.56 (3.36-29.52)                      | 8.53 (0-29.11)                           | 12.1 (8.8-16.4)  | 619 (344-1175)   | 28 (14-56)                 |
|                          | <i>Pinus pinea</i>       | 150   | 997   | 6.3 (3-18)    | 16 (7.5-68.1)    | 15.5 (8.9-37)    | 13.83 (3.06-30.37)                      | 8.35 (0-29.96)                           | 11.2 (6.9-13.6)  | 790 (474-1020)   | 26 (14-45)                 |
|                          | <i>Pinus sylvestris</i>  | 188   | 1789  | 6.3 (3-15)    | 14 (7.5-81.2)    | 13.4 (8.8-31.7)  | 17.07 (3.74-34.44)                      | 10.02 (0-33.2)                           | 11.1 (8.8-16.6)  | 642 (392-1115)   | 38 (24-60)                 |
|                          | <i>Quercus faginea</i>   | 219   | 1842  | 5.9 (3-17)    | 16.7 (7.5-92.9)  | 14.7 (8.4-51.4)  | 16.38 (2.32-50.01)                      | 9.64 (0-49.61)                           | 11.2 (9-14.5)    | 630 (331-1094)   | 31 (17-50)                 |
|                          | <i>Quercus pyrenaica</i> | 38    | 298   | 6.1 (3-12.5)  | 19.3 (7.8-58.5)  | 17.2 (9.4-36.6)  | 16.59 (3.23-44.54)                      | 9.58 (0-44.12)                           | 13.8 (10.1-17.5) | 714 (349-1038)   | 30 (14-52)                 |
|                          | <i>Quercus suber</i>     | 228   | 1779  | 7.2 (3-14.5)  | 19.2 (7.5-98.4)  | 18.6 (10-44.1)   | 17.09 (2.31-43.06)                      | 10.33 (0-42.67)                          | 12.9 (10.2-17.1) | 654 (338-871)    | 30 (14-46)                 |
|                          |                          |       |       |               |                  |                  |                                         |                                          |                  |                  |                            |
| <i>Quercus petraea</i>   | <i>Fagus sylvatica</i>   | 73    | 809   | 12.4 (3-26.5) | 24.9 (7.5-143.3) | 19.2 (9.9-40.2)  | 25.56 (4.27-80.08)                      | 14.62 (0-72.5)                           | 9.8 (5.1-11.9)   | 853 (696-1248)   | 46 (29-68)                 |
|                          | <i>Pinus sylvestris</i>  | 34    | 269   | 8.5 (3.5-21)  | 17 (7.5-80.5)    | 16.5 (10.4-34.4) | 16.16 (3.55-28.09)                      | 9.37 (0-27.69)                           | 9 (6.8-11.6)     | 865 (563-1206)   | 44 (33-82)                 |
| <i>Quercus pyrenaica</i> | <i>Fagus sylvatica</i>   | 160   | 2466  | 10.8 (3-27)   | 18.7 (7.5-129.9) | 16.6 (9-51.3)    | 21.57 (3.35-45.43)                      | 12.78 (0-44.88)                          | 11.4 (8.8-15.9)  | 756 (413-1594)   | 34 (26-54)                 |
|                          | <i>Pinus pinaster</i>    | 64    | 529   | 10.1 (4-26)   | 17.8 (7.5-82.8)  | 17.1 (9.2-48.5)  | 20.04 (3.47-46.04)                      | 11.55 (0-39.93)                          | 9.6 (7.1-12.3)   | 673 (469-1341)   | 35 (17-68)                 |
|                          | <i>Pinus sylvestris</i>  | 199   | 2341  | 9.5 (3-26)    | 17.2 (7.5-76.4)  | 15.5 (8.5-79.9)  | 20.78 (2.88-63.83)                      | 12.37 (0-62.63)                          | 9.7 (7.4-11.1)   | 678 (522-1055)   | 34 (23-70)                 |
|                          | <i>Quercus ilex</i>      | 43    | 470   | 8.7 (3-21)    | 17.9 (7.7-55.4)  | 15.5 (10-36.6)   | 20.32 (3.23-44.54)                      | 11.96 (0-43.67)                          | 10.3 (6-14.4)    | 726 (333-1094)   | 36 (14-58)                 |
|                          | <i>Quercus robur</i>     | 36    | 221   | 11.8 (3-26.5) | 24.4 (7.6-69.7)  | 23.4 (9.2-41.6)  | 20.82 (4.5-36.14)                       | 12.15 (0-35.7)                           | 12.1 (7.2-13.7)  | 1463 (945-1779)  | 66 (42-78)                 |
| <i>Quercus robur</i>     | <i>Fagus sylvatica</i>   | 27    | 205   | 17.8 (7.5-29) | 34.7 (8.2-107.9) | 29.6 (13.1-60.7) | 27.99 (5.77-55.24)                      | 15.73 (0-46.05)                          | 12.7 (11.2-14.5) | 1559 (1096-1819) | 47 (35-62)                 |
|                          | <i>Quercus pyrenaica</i> | 45    | 477   | 12.9 (3-25)   | 28.8 (7.5-74.8)  | 23.3 (9.2-49.3)  | 21.11 (5.11-36.14)                      | 11.79 (0-35.08)                          | 12.1 (7.2-13.7)  | 1470 (921-1779)  | 66 (42-78)                 |
| <i>Quercus suber</i>     | <i>Pinus pinaster</i>    | 112   | 892   | 6.9 (3-16)    | 21.9 (7.5-76.4)  | 18.8 (10.7-43.3) | 17.67 (2.74-46.5)                       | 9.91 (0-43.07)                           | 14.5 (12.1-17.7) | 696 (449-822)    | 27 (16-75)                 |
|                          | <i>Pinus pinea</i>       | 126   | 1327  | 6.2 (3-15.5)  | 18.9 (7.5-73.2)  | 17.2 (9.4-31.8)  | 16.69 (2.78-33.08)                      | 9.72 (0-32.68)                           | 14.3 (12.2-17.6) | 662 (410-1716)   | 28 (18-37)                 |
|                          | <i>Quercus ilex</i>      | 289   | 2743  | 7.3 (3-17.5)  | 24.2 (7.5-112)   | 19.6 (10-44.1)   | 19.59 (2.31-44.99)                      | 10.89 (0-44.56)                          | 14.1 (10.9-17.5) | 700 (349-849)    | 29 (14-41)                 |

Note: h – Total tree height (m), d – Diameter at breast height (cm), Dg - Mean quadratic diameter (cm), BA – Basal area (m<sup>2</sup> · ha<sup>-1</sup>), BAL – Basal area of larger trees (m<sup>2</sup> · ha<sup>-1</sup>), T – Mean Annual Temperature (°C), P – Annual Total Precipitation (mm), M – De Martonne Index (mm · °C<sup>-1</sup>)

**Supp. Table S2:** Competition Equivalence Coefficients ( $e_{2-1} = SDI_{\max,sp1}/SDI_{\max,sp2}$  |  $e_{1-2} = SDI_{\max,sp2}/SDI_{\max,sp1}$ ) for the most representative species compositions in Spain

|           |                          | Species 2              |                         |                    |                       |                    |                         |                       |                        |                     |                        |                          |                      |                      |
|-----------|--------------------------|------------------------|-------------------------|--------------------|-----------------------|--------------------|-------------------------|-----------------------|------------------------|---------------------|------------------------|--------------------------|----------------------|----------------------|
| Species 1 |                          | <i>Fagus sylvatica</i> | <i>Pinus halepensis</i> | <i>Pinus nigra</i> | <i>Pinus pinaster</i> | <i>Pinus pinea</i> | <i>Pinus sylvestris</i> | <i>Pinus uncinata</i> | <i>Quercus faginea</i> | <i>Quercus ilex</i> | <i>Quercus petraea</i> | <i>Quercus pyrenaica</i> | <i>Quercus robur</i> | <i>Quercus suber</i> |
|           | <i>Fagus sylvatica</i>   | 1.00                   | 0.54                    | 1.04               | 1.16                  | 0.61               | 1.20                    | 0.86                  | 0.76                   | 0.45                | 0.89                   | 0.81                     | 0.79                 | 0.64                 |
|           | <i>Pinus halepensis</i>  | 1.85                   | 1.00                    | 1.73               | 1.96                  | 1.31               | 2.11                    | 1.60                  | 1.02                   | 0.65                | 1.31                   | 1.31                     | 1.44                 | 1.09                 |
|           | <i>Pinus nigra</i>       | 0.97                   | 0.58                    | 1.00               | 1.12                  | 0.78               | 1.20                    | 0.86                  | 0.68                   | 0.41                | 0.74                   | 0.77                     | 0.77                 | 0.63                 |
|           | <i>Pinus pinaster</i>    | 0.87                   | 0.51                    | 0.89               | 1.00                  | 0.69               | 1.10                    | 0.77                  | 0.55                   | 0.35                | 0.66                   | 0.67                     | 0.68                 | 0.57                 |
|           | <i>Pinus pinea</i>       | 1.65                   | 0.77                    | 1.31               | 1.48                  | 1.00               | 1.66                    | 1.28                  | 0.68                   | 0.45                | 0.93                   | 0.96                     | 1.23                 | 0.83                 |
|           | <i>Pinus sylvestris</i>  | 0.85                   | 0.47                    | 0.84               | 0.91                  | 0.61               | 1.00                    | 0.77                  | 0.58                   | 0.33                | 0.69                   | 0.65                     | 0.64                 | 0.49                 |
|           | <i>Pinus uncinata</i>    | 1.17                   | 0.63                    | 1.16               | 1.31                  | 0.78               | 1.30                    | 1.00                  | 0.84                   | 0.47                | 1.05                   | 0.96                     | 0.91                 | 0.74                 |
|           | <i>Quercus faginea</i>   | 1.36                   | 1.08                    | 1.50               | 1.95                  | 1.61               | 1.81                    | 1.20                  | 1.00                   | 0.66                | 1.10                   | 1.13                     | 1.06                 | 1.20                 |
|           | <i>Quercus ilex</i>      | 2.29                   | 1.59                    | 2.50               | 2.92                  | 2.27               | 3.10                    | 2.12                  | 1.55                   | 1.00                | 1.81                   | 1.85                     | 1.79                 | 1.73                 |
|           | <i>Quercus petraea</i>   | 1.15                   | 0.83                    | 1.41               | 1.58                  | 1.21               | 1.60                    | 0.96                  | 0.92                   | 0.56                | 1.00                   | 1.03                     | 0.95                 | 0.93                 |
|           | <i>Quercus pyrenaica</i> | 1.24                   | 0.78                    | 1.32               | 1.52                  | 1.11               | 1.59                    | 1.04                  | 0.89                   | 0.55                | 0.98                   | 1.00                     | 0.97                 | 0.88                 |
|           | <i>Quercus robur</i>     | 1.27                   | 0.69                    | 1.32               | 1.46                  | 0.81               | 1.59                    | 1.11                  | 0.96                   | 0.57                | 1.05                   | 1.03                     | 1.00                 | 0.83                 |
|           | <i>Quercus suber</i>     | 1.58                   | 0.92                    | 1.59               | 1.75                  | 1.21               | 2.03                    | 1.36                  | 0.91                   | 0.59                | 1.11                   | 1.15                     | 1.22                 | 1.00                 |

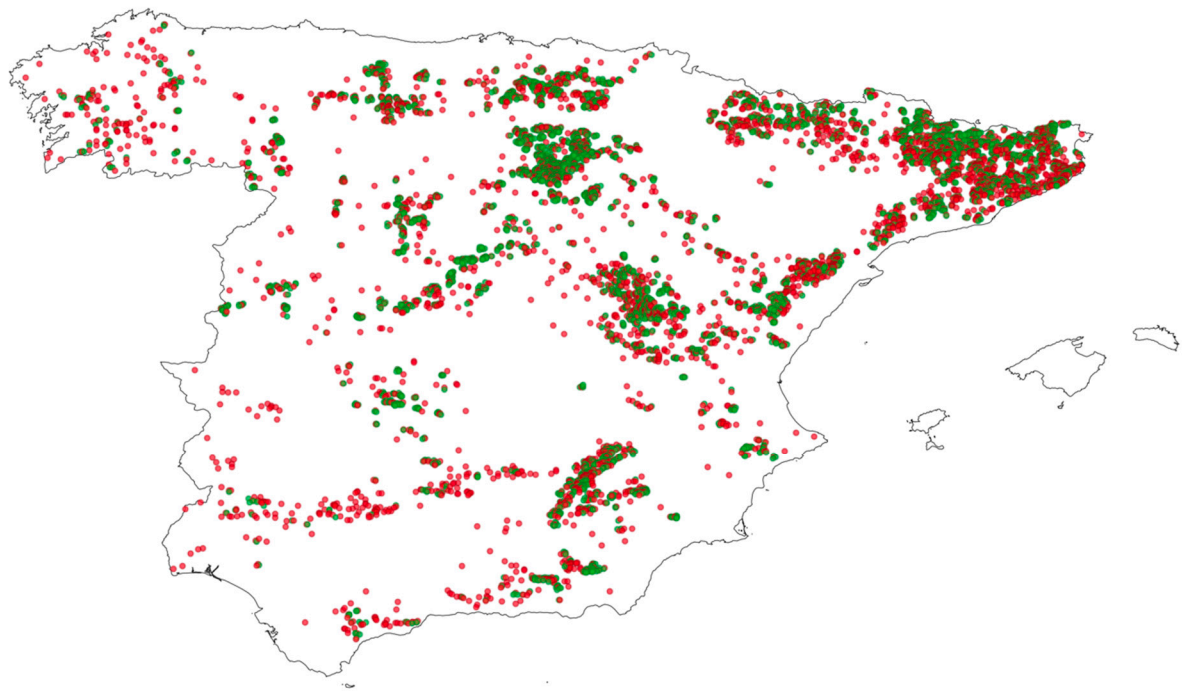

**Supplementary Figure S1:** Location of the Spanish National Forest Inventory plots selected to fit the H-D models for the 29 different mixtures analyzed in this study.

*Note: Green points represent monospecific plots and red points represent mixed plots.*

### Climatic influence on Total Tree Height for *Pinus halepensis*

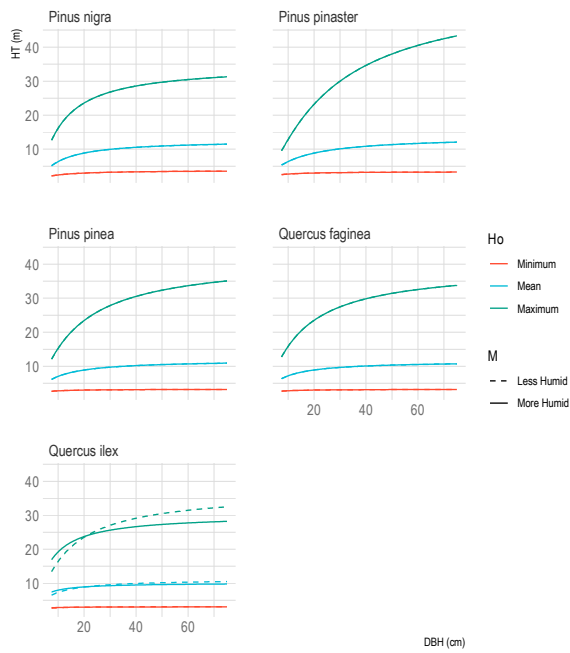

(a)

### Climatic influence on Total Tree Height for *Pinus nigra*

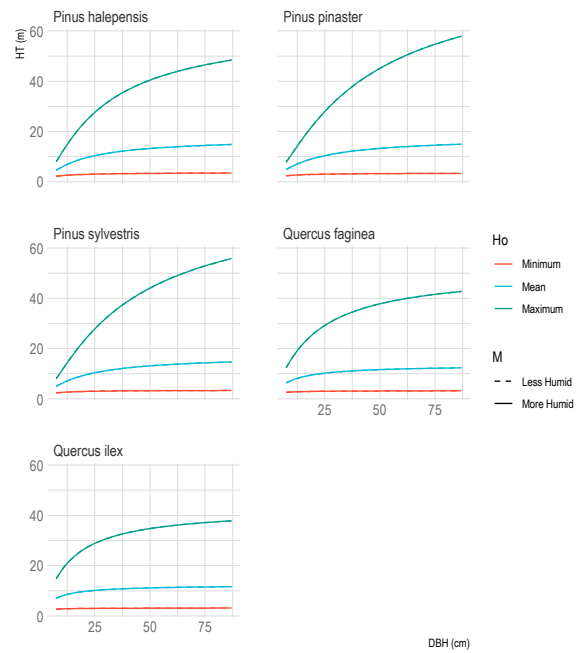

(b)

### Climatic influence on Total Tree Height for *Pinus pinaster*

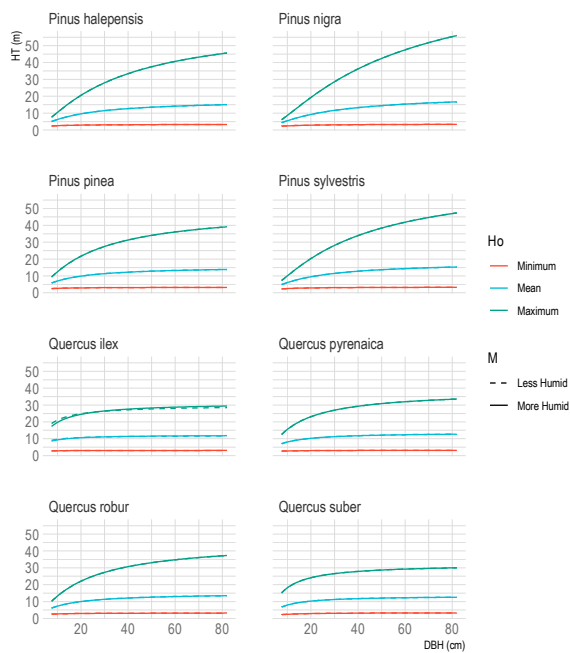

(c)

### Climatic influence on Total Tree Height for *Pinus pinea*

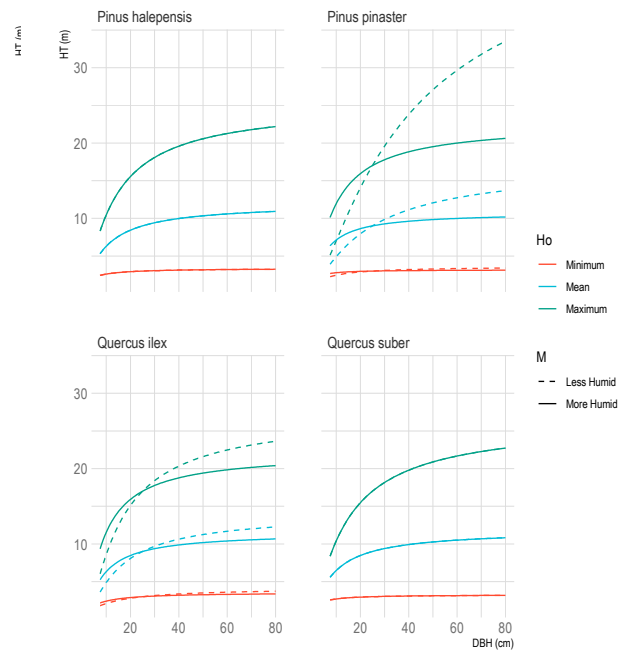

(d)

**Climatic influence on Total Tree Height for *Pinus sylvestris***

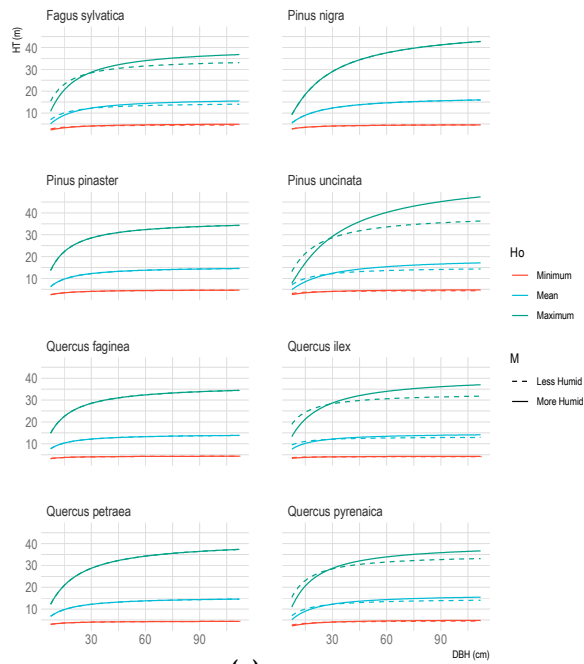

(e)

**Climatic influence on Total Tree Height for *Fagus sylvatica***

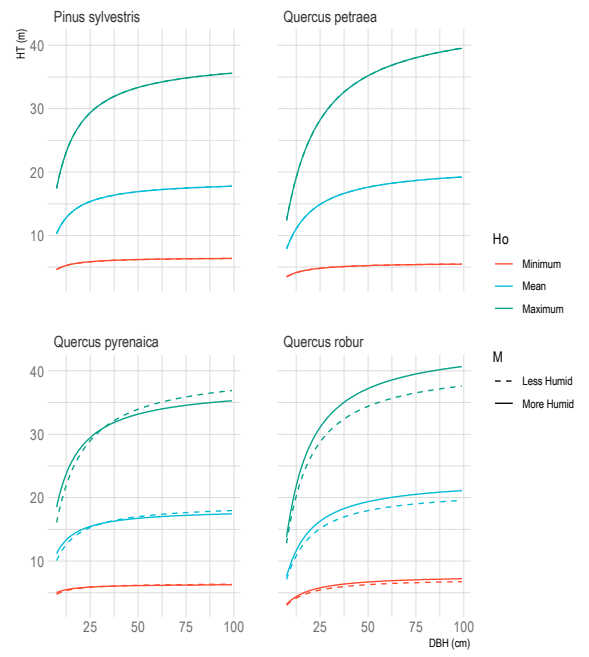

(f)

**Climatic influence on Total Tree Height for *Quercus ilex***

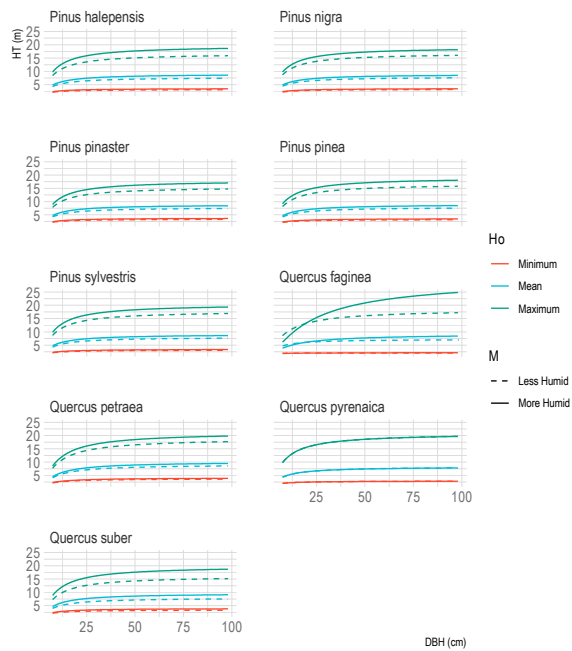

(g)

**Climatic influence on Total Tree Height for *Quercus faginea***

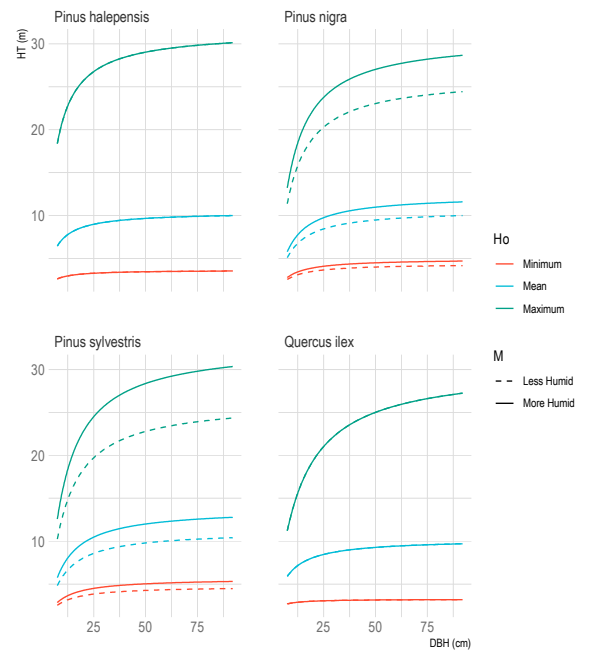

(h)

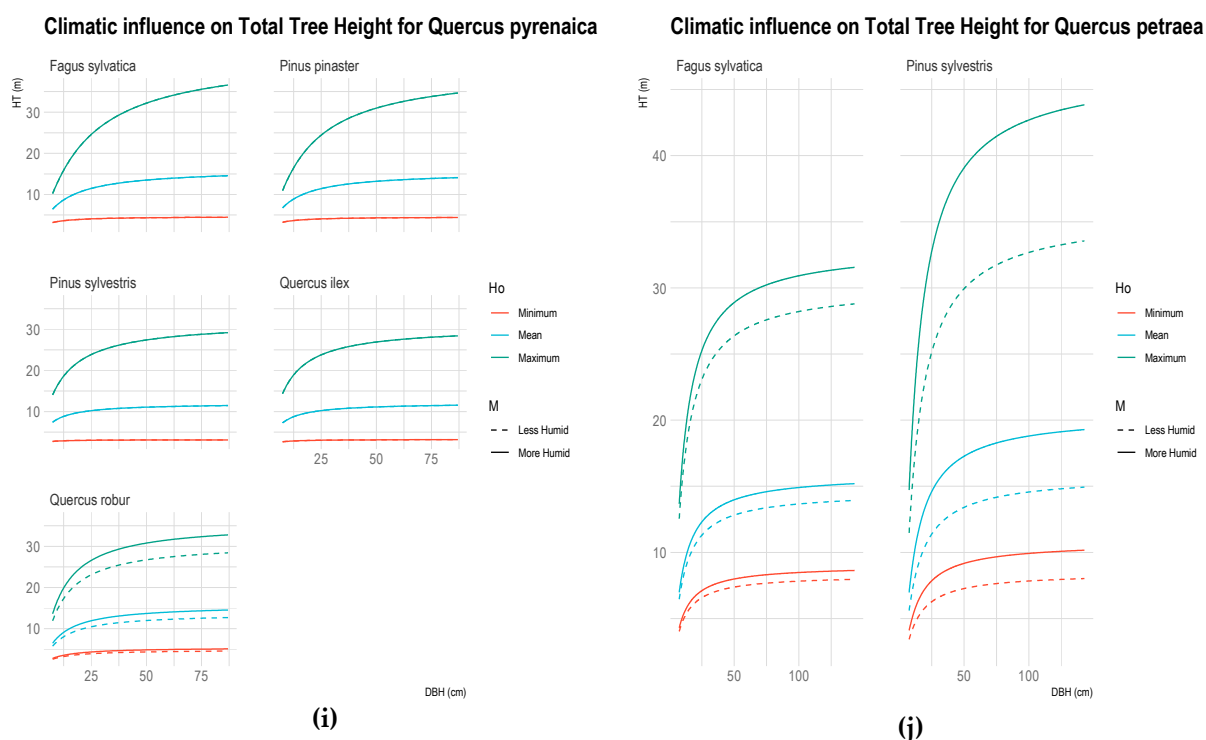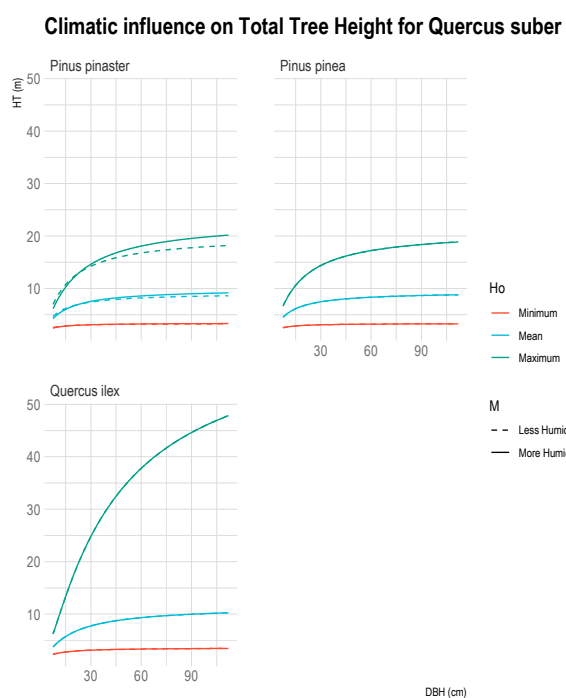

**Supplementary Figure S2: Aridity influence in terms of the De Martonne Index (M), on H-D relationship for different stand dominant height (Ho)**



Mean quadratic diameter (Dg) distribution in conifer-conifer mixed stands

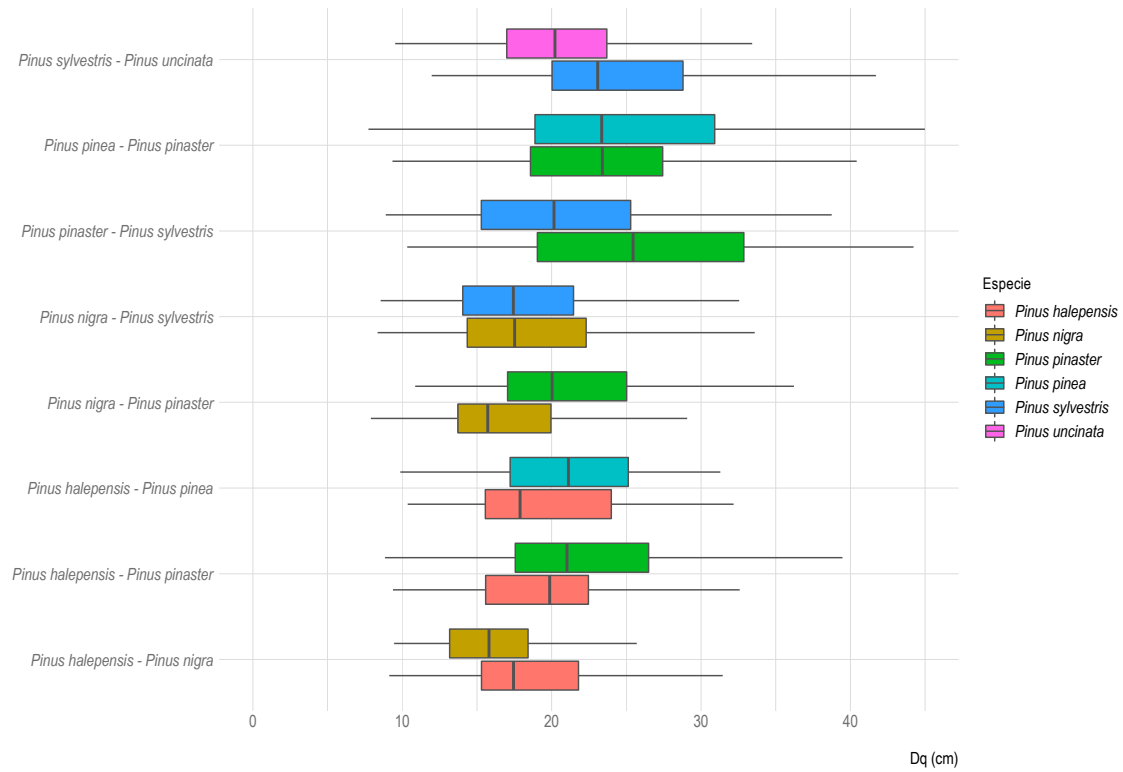

(a)

Mean quadratic diameter (Dg) distribution in broadleaved-conifer mixed stands

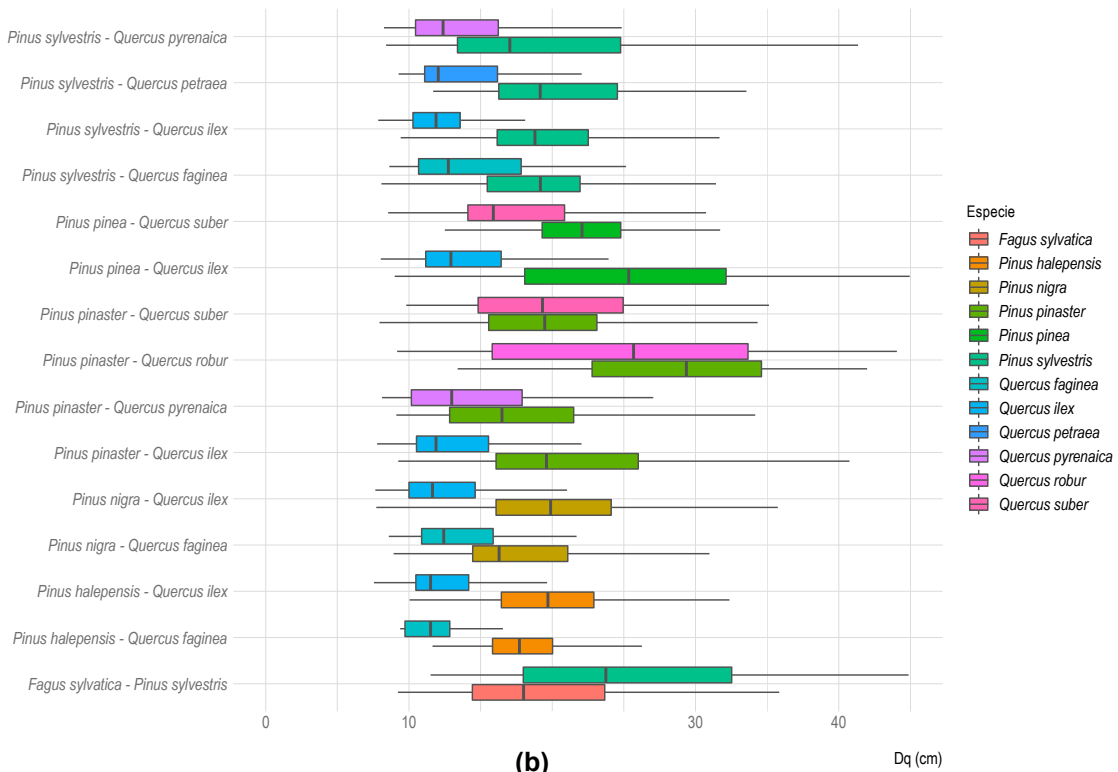

(b)

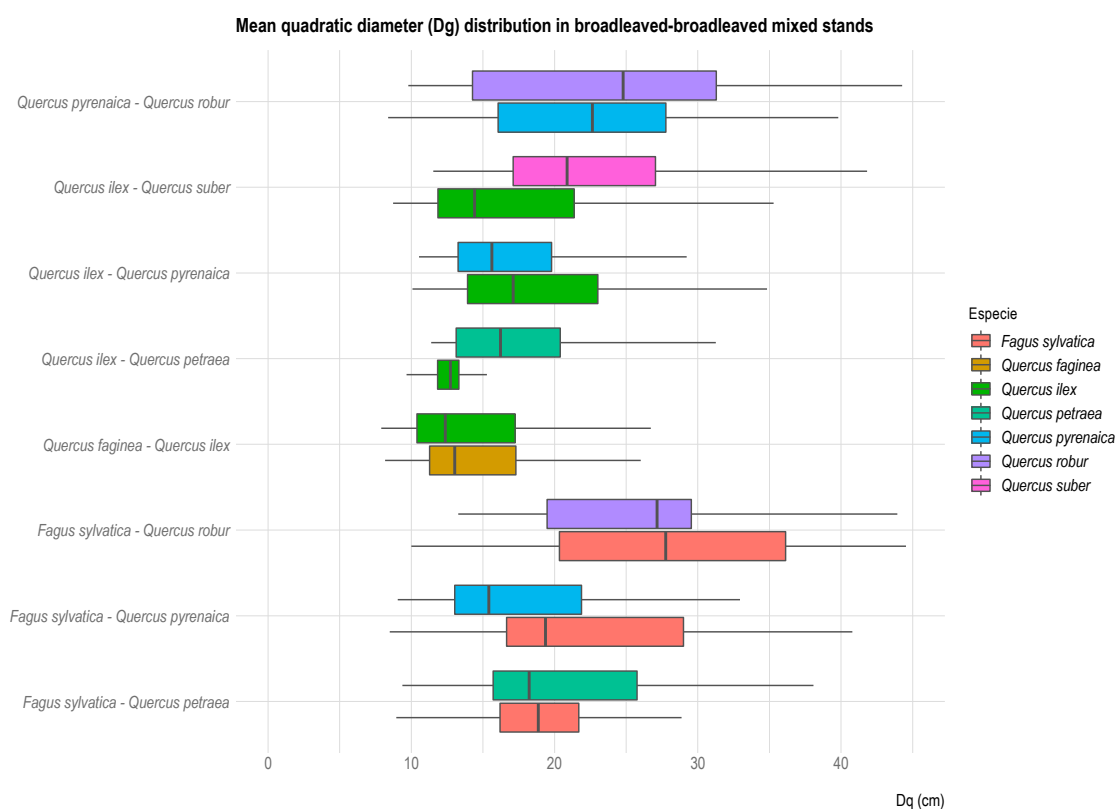

(c)

**Supplementary Figure S3:** Mean values of mean quadratic diameter by species (Dgi) for the selected SNFI plots for the different conifer-conifer (a), conifer-broadleaved (b) and broadleaved-broadleaved (c) mixtures analyzed

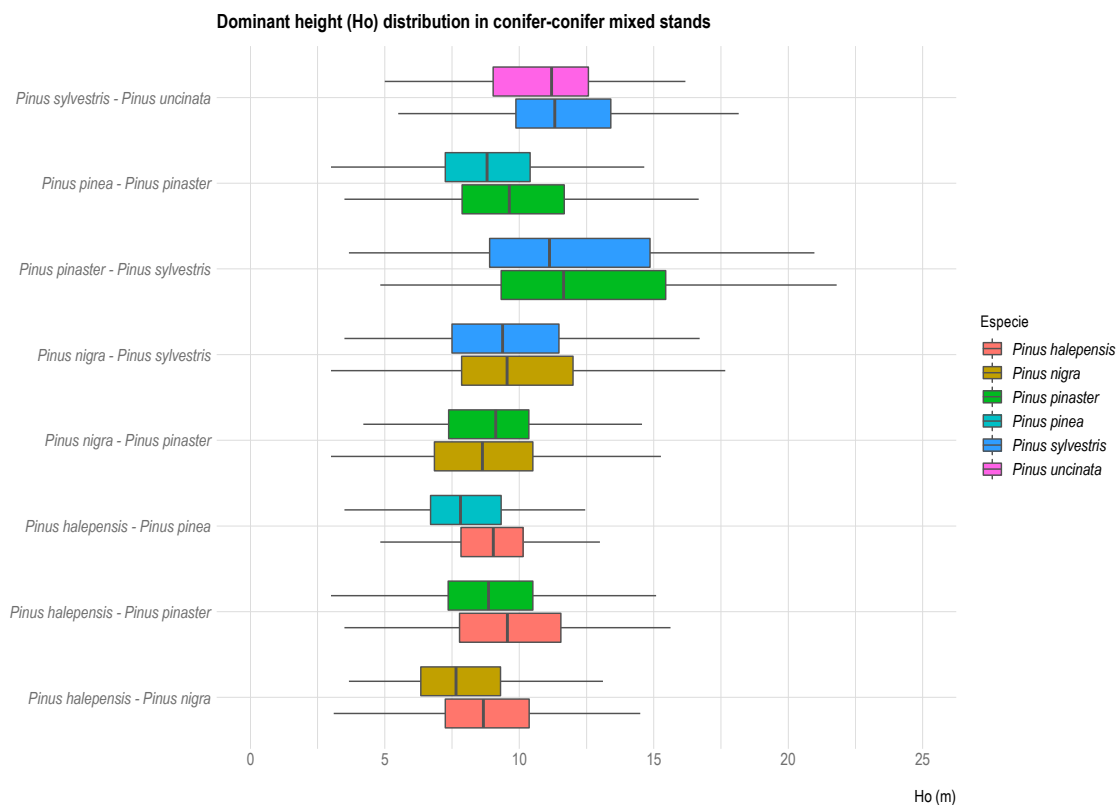

(a)

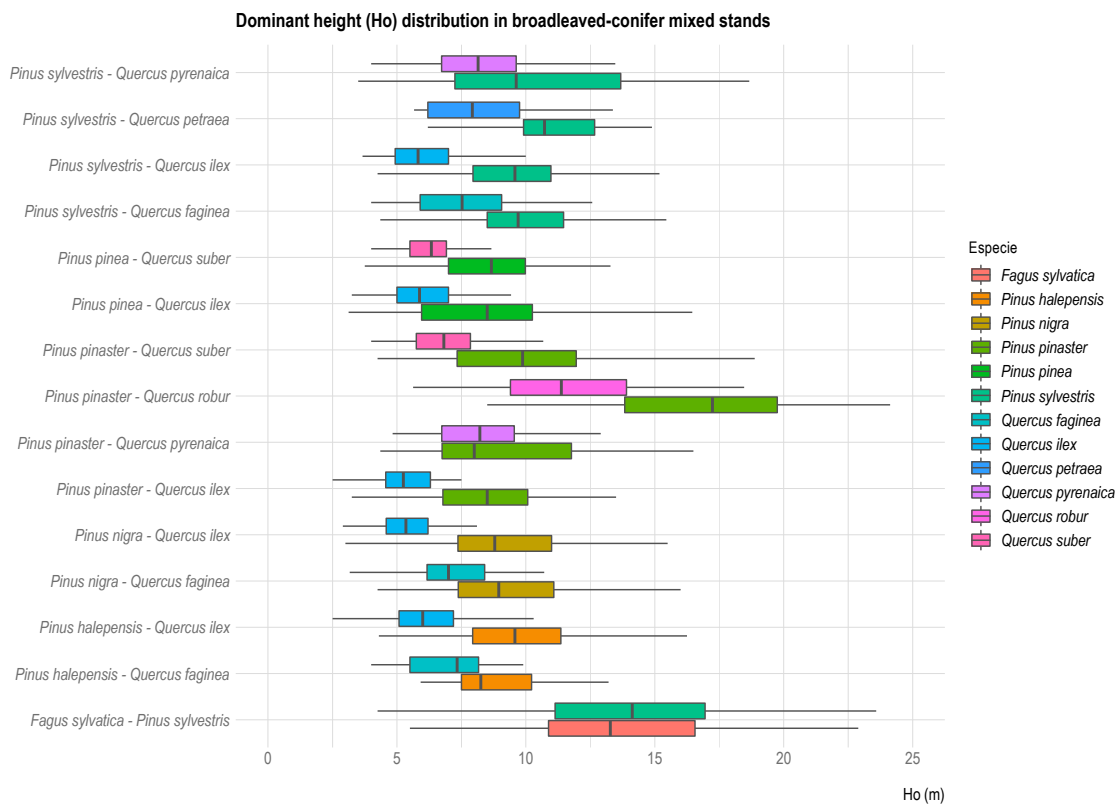

(b)

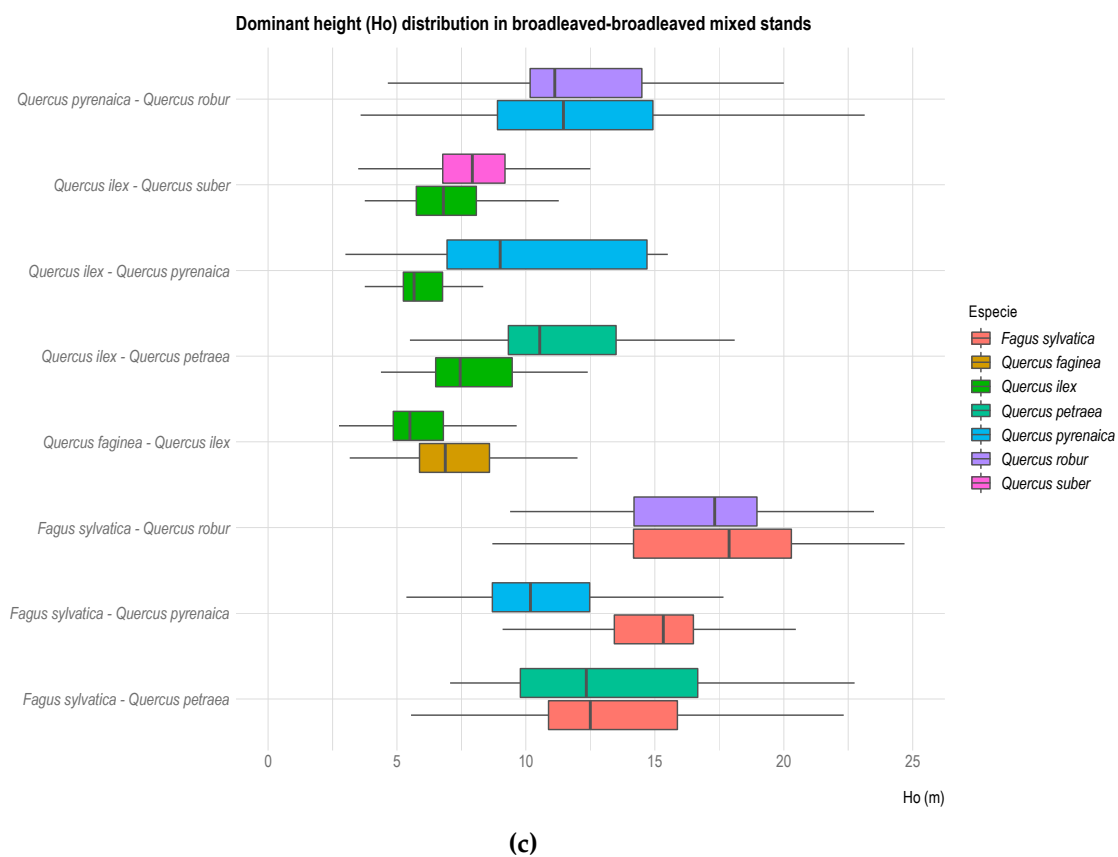

**Supplementary Figure S4:** Mean values of dominant height by species ( $Ho_i$ ) for the selected SNFI plots for the different conifer-conifer (a), conifer-broadleaved (b) and broadleaved-broadleaved (c) mixtures analyzed
